# Supplementary material for: Oil/water interfacial self-assembly for the organization of hydrophobic NaYF4:Yb, Er nanoplatelets into closely-packed fluorescent nanofilms
Source: Royal Society of Chemistry journal article supplement (doi:10.1039/c1jm13381k), 2011-11-16
Supplement: c1jm13381k.pdf [file c1jm13381k.pdf]

Supporting information

## Oil/water Interfacial Self-assembly for the Organization of Hydrophobic NaYF<sub>4</sub>:Yb, Er Nanoplatelets into Closely-Packed Fluorescent Nanofilms

By Yuan Ren, Min Chen, Linfeng Hu, Xiaosheng Fang and  
Limin Wu\*

Department of Materials Science and Advanced Materials Laboratory,  
10 Fudan University, Shanghai 200433 (P. R. China)

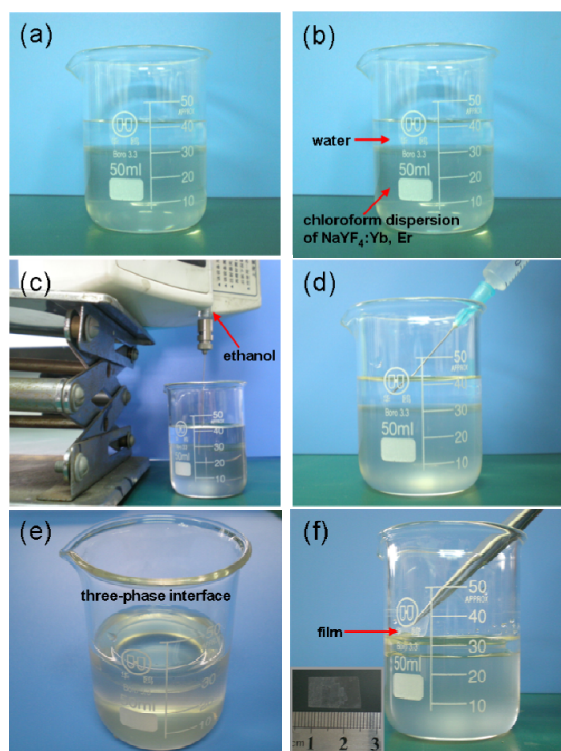

**Figure S1.** Photographs of the detailed procedure for oil–water interfacial self-assembly: (a) chloroform dispersion of UCNPs,  
15 (b) addition of water on the top of the chloroform dispersion to form an “oil/water” interface, (c) addition of ethanol at the “oil/water” interface as the inducer and the self-assembly of UCNPs occurred at the interface, (d) removal of the water phase using a syringe after the self-assembly procedure, (e) the formed  
20 oil/water/air three-phase interface after removing most of water, (f) the transferred film to a glass substrate by pulling the substrate out of the water phase, the inset shows the as-prepared monolayer film deposited on a glass substrate.
